# Supplementary material
Source: PubMed Central journal article supplement (PMC3517717)

## Supplementary Table 1

| <b>Gene Symbol</b> | <b>Name</b>                                | <b>Log FC</b> | <b>P value</b> |
|--------------------|--------------------------------------------|---------------|----------------|
| <i>C7orf11</i>     | Chromosome 7 open reading frame 11         | -0.55         | 7.46E-05       |
| <i>CCNA2</i>       | Cyclin A2                                  | -0.71         | 8.38E-05       |
| <i>CDCA4</i>       | Cell division cycle associated 4           | -0.62         | 2.84E-04       |
| <i>CDCA7</i>       | Cell division cycle associated 7           | -1.07         | 4.36E-05       |
| <i>CDK14</i>       | Cyclin-dependent kinase 14                 | -0.66         | 5.83E-04       |
| <i>CKS1B</i>       | CDC28 protein kinase regulatory subunit 1B | -0.71         | 2.36E-04       |
| <i>DTL</i>         | Denticleless homolog ( <i>Drosophila</i> ) | -0.56         | 5.29E-04       |
| <i>FGF2</i>        | Fibroblast growth factor 2                 | -0.62         | 5.80E-04       |
| <i>HMGB1</i>       | High-mobility group protein B1             | -0.78         | 1.70E-04       |
| <i>PDCD10</i>      | Programmed cell death protein 10           | -0.51         | 3.41E-04       |
| <i>SKP2</i>        | S-phase kinase-associated protein 2 (p45)  | -0.60         | 5.48E-04       |

# Supplementary Table 1

| Gene Symbol                           | Name                                                                    | Log FC | P value  |
|---------------------------------------|-------------------------------------------------------------------------|--------|----------|
| Cell adhesion                         |                                                                         |        |          |
| <i>AMICA1</i>                         | Adhesion molecule, interacts with CXADR antigen 1                       | -0.90  | 8.87E-04 |
| <i>C1orf38</i>                        | Chromosome 1 open reading frame 38                                      | -0.66  | 1.25E-02 |
| <i>CCL2</i>                           | Chemokine (C-C motif) ligand 2                                          | -0.97  | 1.76E-04 |
| <i>CD209</i>                          | CD209 molecule                                                          | -0.68  | 9.96E-03 |
| <i>CD44</i>                           | CD44 molecule (Indian blood group)                                      | -0.04  | 9.98E-01 |
| <i>CDH22</i>                          | Cadherin-like 22                                                        | -0.94  | 3.77E-04 |
| <i>COL12A1</i>                        | Collagen, type XII, alpha 1                                             | -1.05  | 6.69E-05 |
| <i>COL18A1</i>                        | Collagen, type XVIII, alpha 1                                           | -0.67  | 9.36E-03 |
| <i>COL6A2</i>                         | Collagen, type VI, alpha 2                                              | -0.12  | 9.69E-01 |
| <i>COL8A1</i>                         | Collagen, type VIII, alpha 1                                            | -1.54  | 2.07E-07 |
| <i>CXCL12</i>                         | Chemokine (C-X-C motif) ligand 12 (stromal cell-derived factor 1)       | -0.82  | 1.49E-03 |
| <i>FNI</i>                            | Fibronectin 1                                                           | -1.69  | 5.03E-08 |
| <i>LAMB3</i>                          | Laminin, beta 3                                                         | -1.04  | 8.00E-05 |
| <i>LAMC3</i>                          | Laminin, gamma 3                                                        | -0.96  | 2.49E-04 |
| <i>LOXL2</i>                          | Lysyl oxidase-like 2                                                    |        |          |
| <i>MGAT5</i>                          | Alpha-1,6-mannosylglycoprotein 6-beta-N-acetylglucosaminyltransferase A | -0.82  | 2.86E-03 |
| <i>MOG</i>                            | Myelin oligodendrocyte glycoprotein                                     | 0.68   | 1.36E-02 |
| <i>MPZL3</i>                          | Myelin protein zero-like 3                                              | -1.15  | 2.36E-05 |
| <i>NFASC</i>                          | Neurofascin homolog (chicken)                                           | -0.95  | 2.63E-04 |
| <i>NFASC</i>                          | Neurofascin homolog (chicken)                                           | -0.90  | 9.44E-04 |
| <i>PCDH10</i>                         | Protocadherin 10                                                        | -1.15  | 3.72E-05 |
| <i>PCDH18</i>                         | Protocadherin 18                                                        | -1.15  | 3.72E-05 |
| <i>PCDH18</i>                         | Protocadherin 18                                                        | -0.68  | 8.54E-03 |
| <i>PCDHA2</i>                         | Protocadherin alpha 2                                                   | -0.65  | 1.15E-02 |
| <i>PCDHA5</i>                         | Protocadherin alpha 5                                                   | -0.65  | 1.26E-02 |
| <i>PCDHGA3</i>                        | Protocadherin gamma subfamily A, 3                                      | -1.08  | 4.81E-05 |
| <i>PODXL</i>                          | Podocalyxin-like                                                        | -1.56  | 1.69E-07 |
| <i>PTPRU</i>                          | Protein tyrosine phosphatase, receptor type, U                          | -0.92  | 5.88E-04 |
| <i>SDC3</i>                           | Syndecan 3                                                              | -0.69  | 8.16E-03 |
| <i>SPON1</i>                          | Spondin 1, extracellular matrix protein                                 | -0.91  | 5.88E-04 |
| <i>SRPX2</i>                          | Sushi-repeat-containing protein, X-linked 2                             | -0.74  | 4.81E-03 |
| <i>SUSD5</i>                          | Sushi domain containing 5                                               | -1.14  | 2.85E-05 |
| <i>THBS1</i>                          | Thrombospondin 1                                                        | -0.68  | 8.47E-03 |
| <i>TRIP6</i>                          | Thyroid hormone receptor interactor 6                                   | -0.12  | 9.61E-01 |
| Angiogenesis                          |                                                                         |        |          |
| <i>GNA13</i>                          | Guanine nucleotide binding protein (G protein), alpha 13                | 0.82   | 2.07E-03 |
| <i>HOXB13</i>                         | Homeobox B13                                                            | 1.19   | 1.49E-04 |
| <i>PDCD10</i>                         | Programmed cell death 10                                                | 0.58   | 3.46E-02 |
| <i>PLCD3</i>                          | Phospholipase C, delta 3                                                | 1.02   | 9.58E-05 |
| <i>TGFB2</i>                          | Transforming growth factor, beta 2                                      | 0.19   | 8.12E-01 |
| Positive regulation of cell migration |                                                                         |        |          |
| <i>F2R</i>                            | Coagulation factor II (thrombin) receptor                               | 1.18   | 1.82E-05 |
| <i>TGFB2</i>                          | Transforming growth factor, beta 2                                      | 0.19   | 8.12E-01 |
| <i>SPAG9</i>                          | Sperm associated antigen 9                                              | 0.85   | 1.60E-03 |

# Supplementary Figure 1

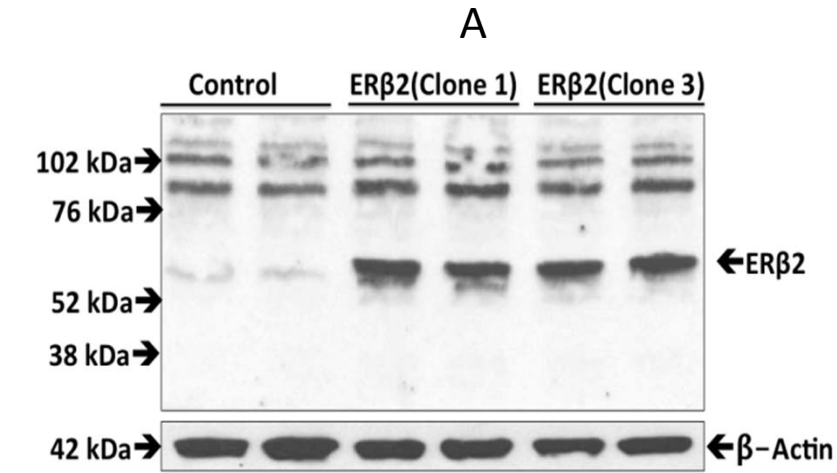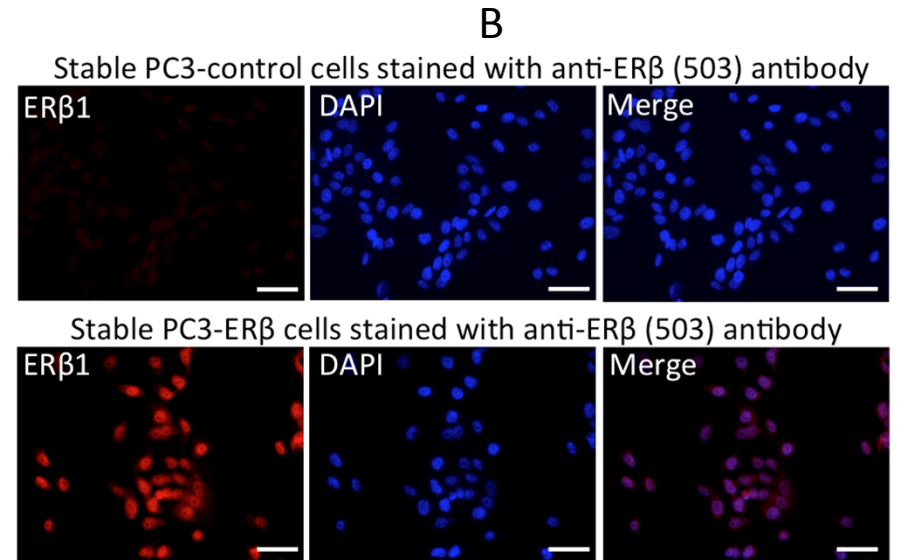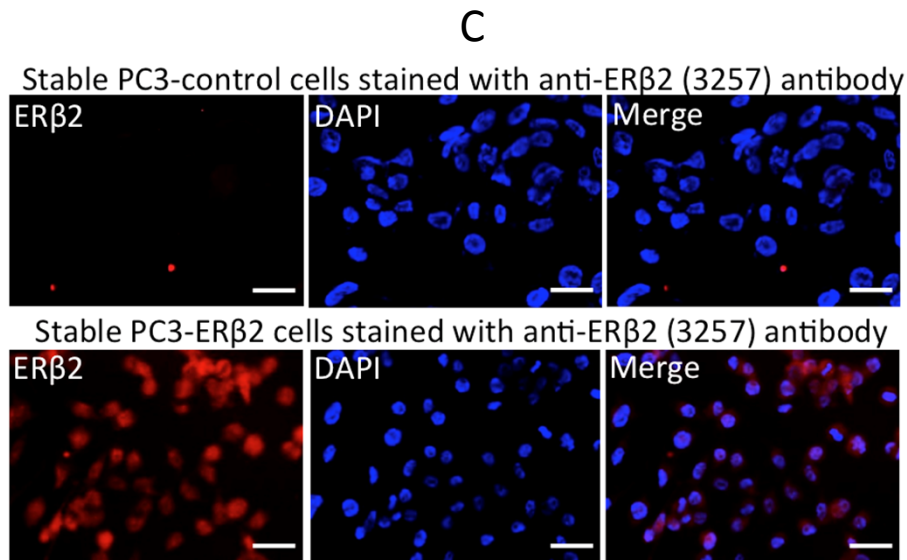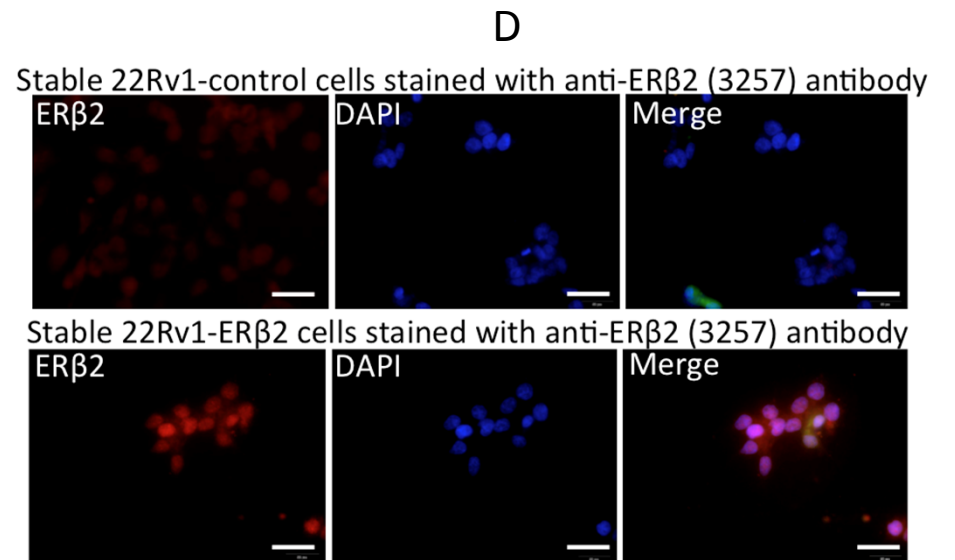

Supplementary Figure 2

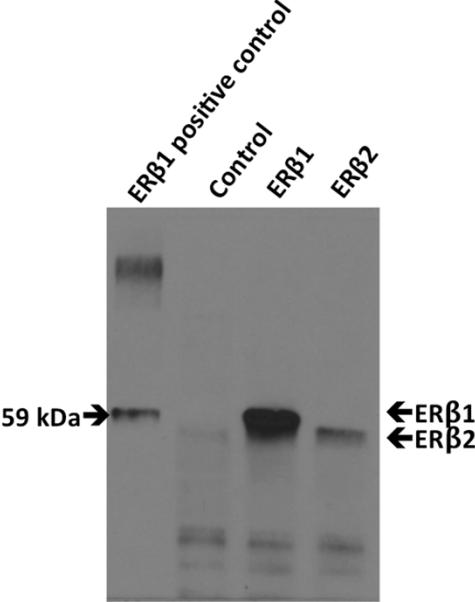

# Supplementary Figure 3

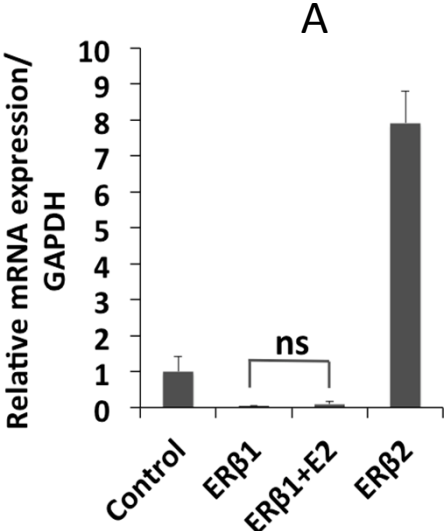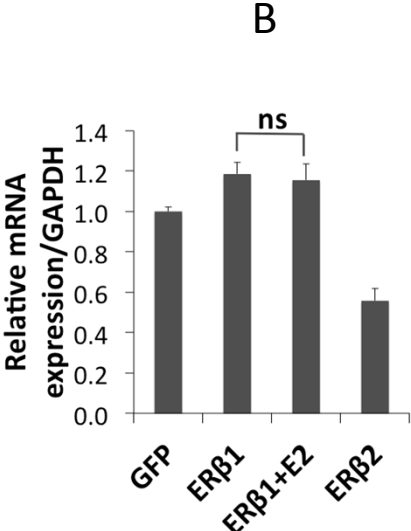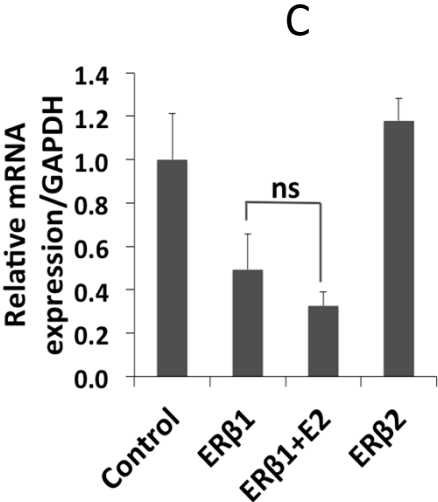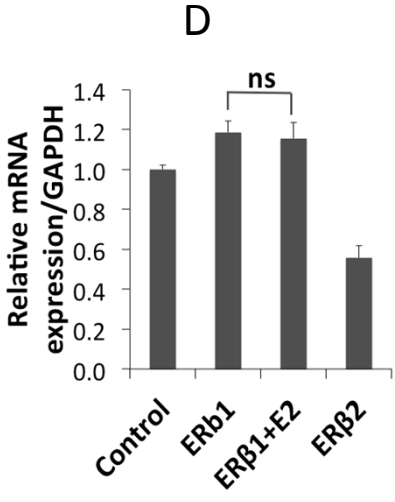

Supplement: supp_me.2012.1227_Supplementary_Material.pdf [file supp_me.2012.1227_Supplementary_Material.pdf]
